# Supplementary material for: The efficient faradaic Li4Ti5O12@C electrode exceeds the membrane capacitive desalination performance
Source: Royal Society of Chemistry journal article supplement (doi:10.1039/c9ta00700h), 2019-01-01
Supplement: c9ta00700h1.pdf [file c9ta00700h1.pdf]

## Efficient Faradaic $\text{Li}_4\text{Ti}_5\text{O}_{12}@\text{C}$ Electrode Enabling Exceeding Membrane Capacitive Desalination Performance

Lu Guo<sup>1</sup>, Dezhi Kong<sup>1</sup>, Mei Er Pam<sup>1</sup>, Shaozhuan Huang<sup>1</sup>, Meng Ding<sup>1</sup>, Yang Shang<sup>1</sup>,  
Chengding Gu<sup>2</sup>, Yinxi Huang<sup>1</sup> and Hui Ying Yang<sup>1\*</sup>

1. Pillar of Engineering Product Development (EPD), Singapore University of Technology and Design, 8 Somapah Road, 487372, Singapore
2. Department of Chemistry, National University of Singapore, 3 Science Drive 3, 117543 Singapore

\*E-mail: [yanghuiying@sutd.edu.sg](mailto:yanghuiying@sutd.edu.sg)

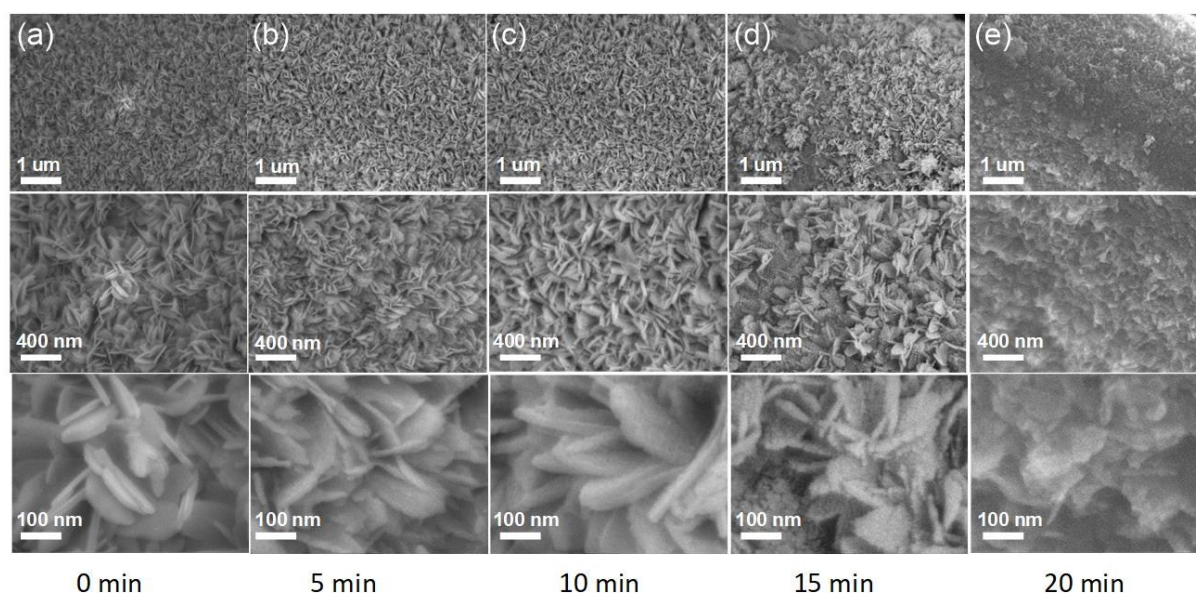

Fig S1. SEM images of LTO@C NFAs under various deposition times of PPy layer.

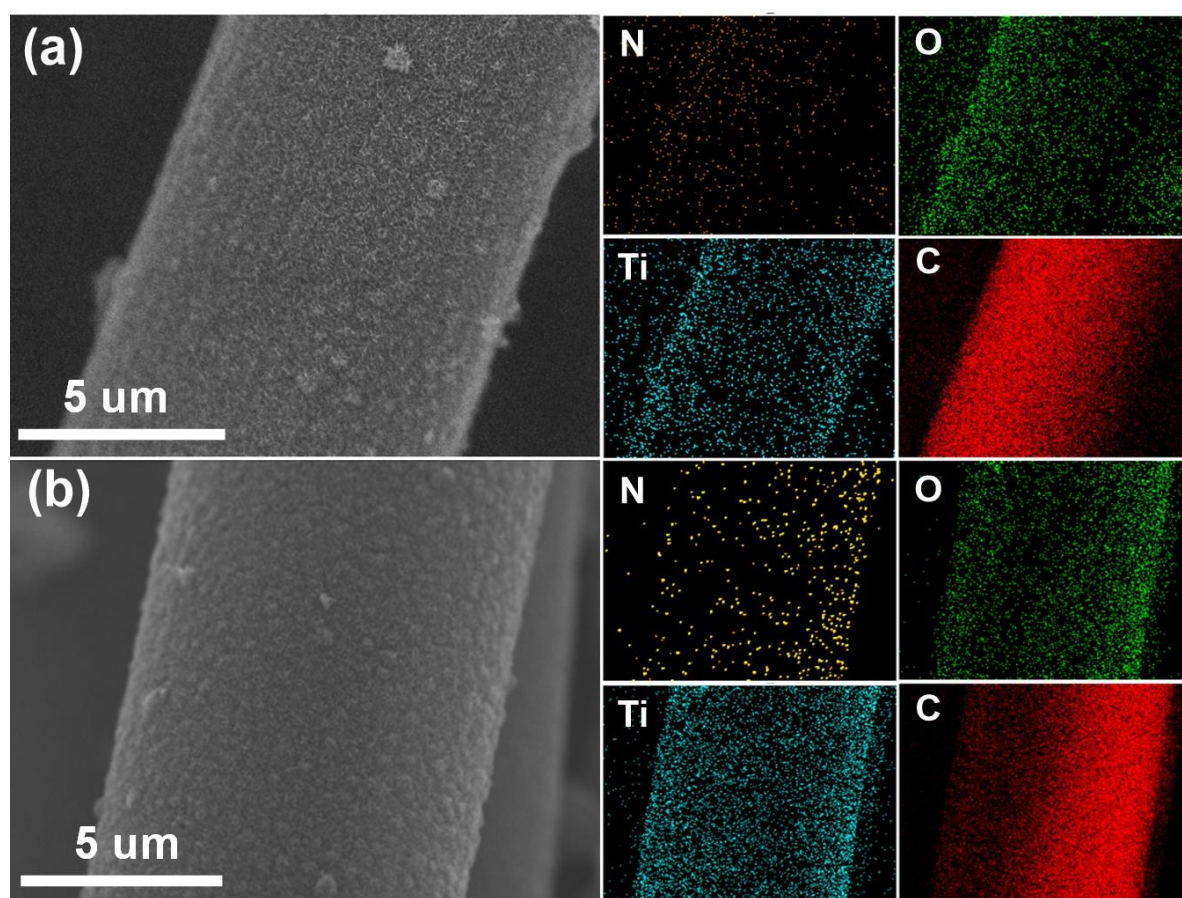

Fig S2. SEM images and EDX elemental mappings of N, O, Ti, C for LTO NFAs (a) and LTO@C NFAs (b).

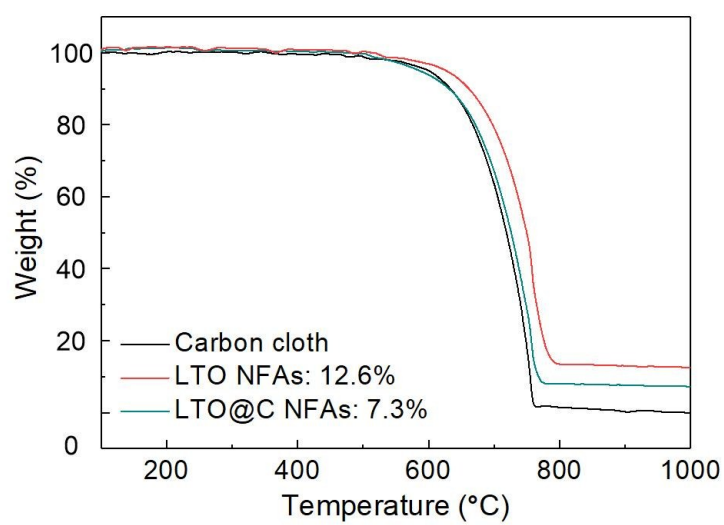

Fig S3. Thermogravimetric analysis (TGA) curves of carbon cloth, LTO NFAs and LTO@C NFAs at 5 °C min<sup>-1</sup> for the thermal decomposition in air atmosphere.



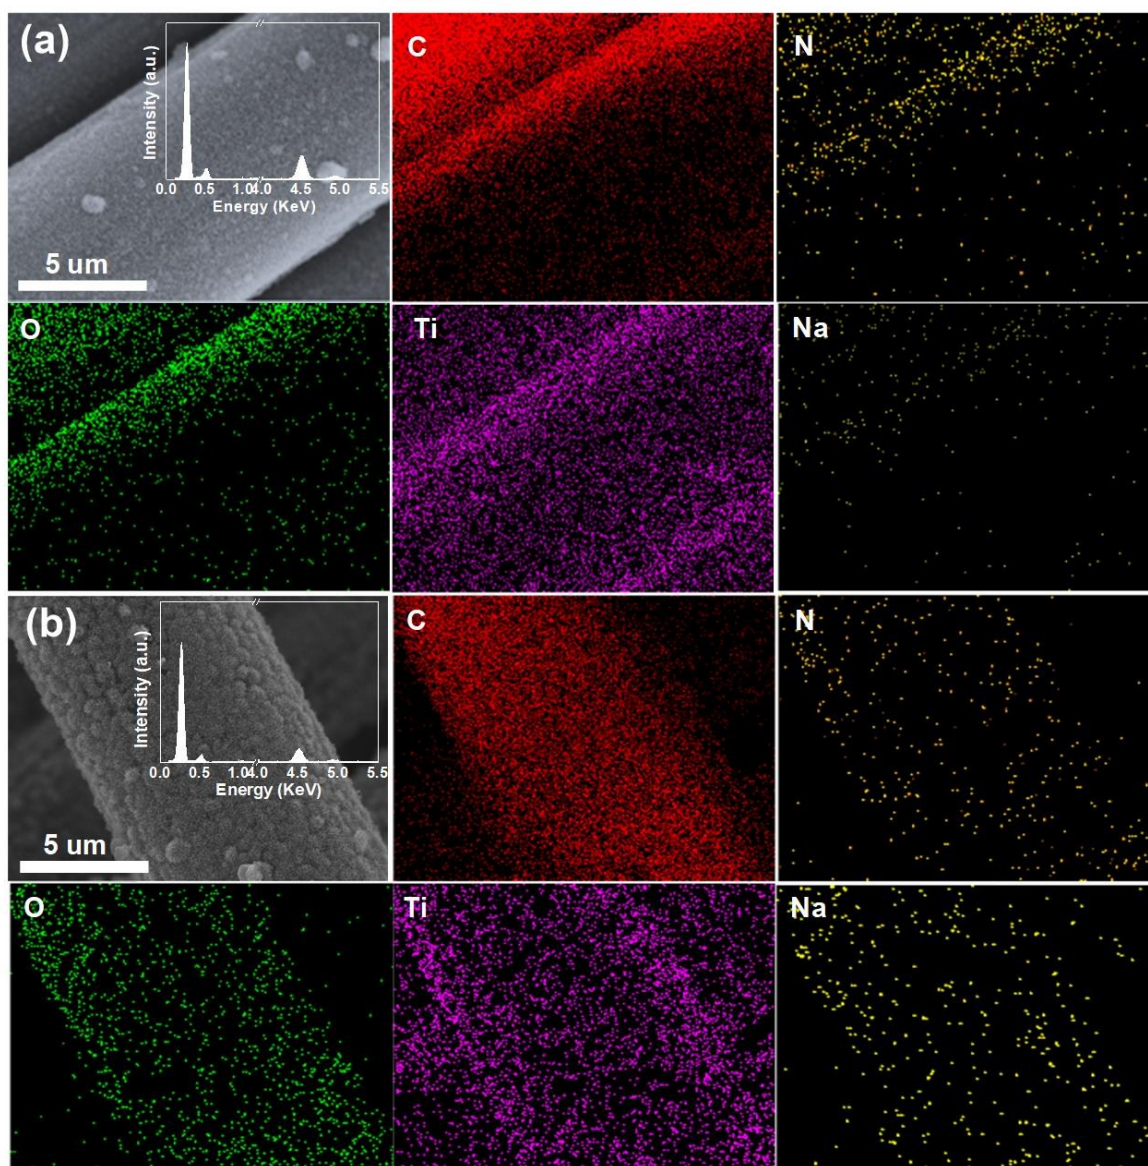

Fig S4. SEM images and EDS elemental mappings of N, O, Ti, C for LTO@C NFAs after sodium adsorption under CV (a) and CC (b) operational mode.

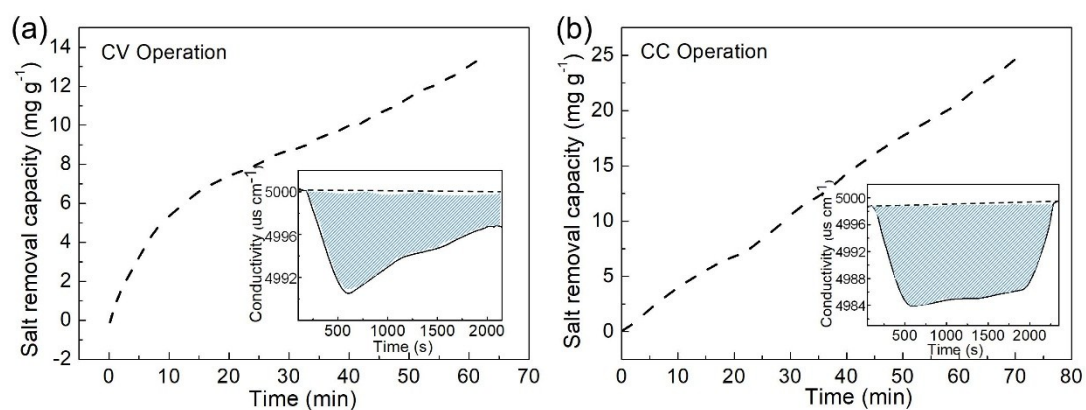

Fig S5. The salt adsorption performance of single-pass operational mode under CV and CC operational mode with LTO@C NFAs electrode.

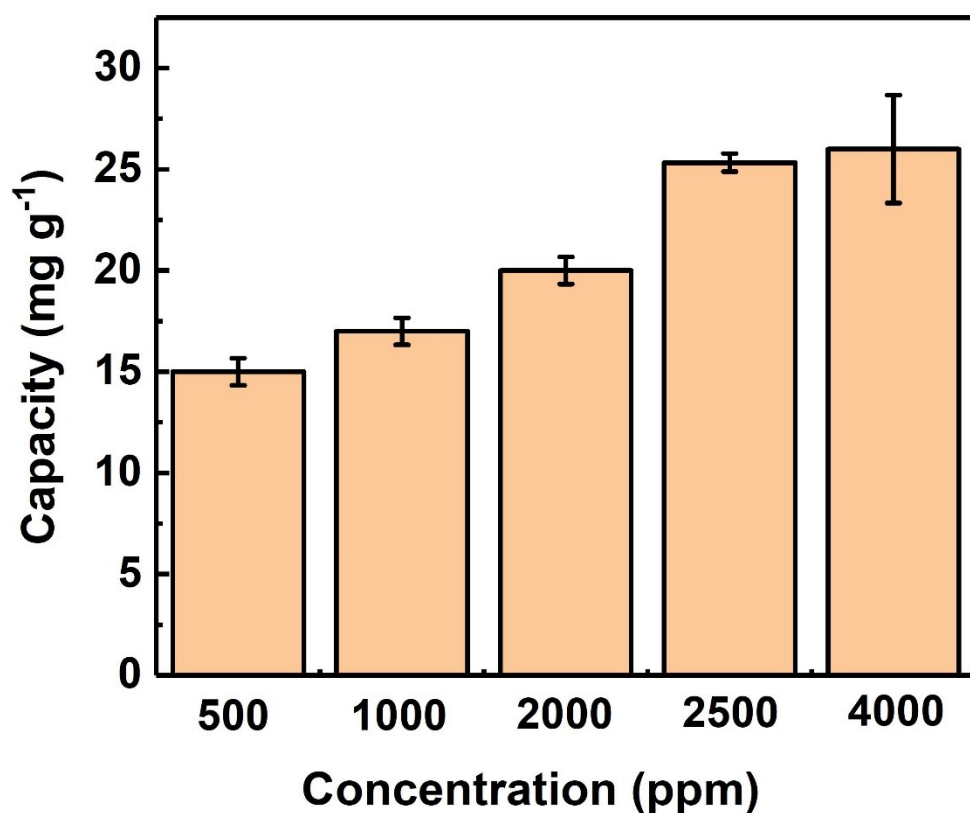

Fig S6. Desalination performance of LTO@C NFAs electrode with only AEM applied under different feed concentration.

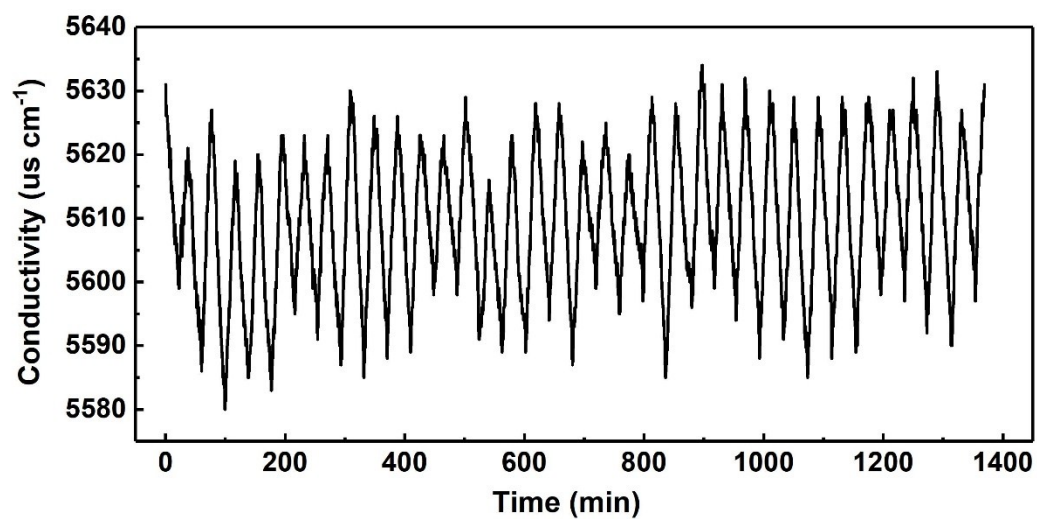

Fig S7. Cycling performance of LTO@C NFAs electrode with only AEM applied.

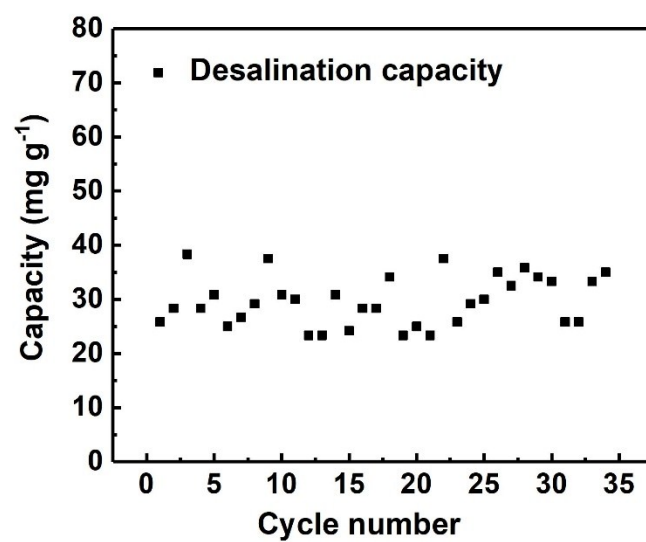

Fig S8. Cycling performance of LTO@C NFAs electrode with only AEM applied.
